# Supplementary material
Source: PubMed Central journal article supplement (PMC8879396)
Supplement: NIHMS1778817-supplement-1.pdf [file NIHMS1778817-supplement-1.pdf]

## Supplement Materials:

Supplement Table 1. List of walkable destinations and subdomains used in this study

| <b>Primary Domain</b>             | <b>Destinations</b>                                                                                                                                                                                                                                                                                                                                                                                                                                                                                                                                                                                                                                                                                                                                                                                                                                                                                                                              |
|-----------------------------------|--------------------------------------------------------------------------------------------------------------------------------------------------------------------------------------------------------------------------------------------------------------------------------------------------------------------------------------------------------------------------------------------------------------------------------------------------------------------------------------------------------------------------------------------------------------------------------------------------------------------------------------------------------------------------------------------------------------------------------------------------------------------------------------------------------------------------------------------------------------------------------------------------------------------------------------------------|
| 1. Walkable destinations          | Small grocers/bodegas/medium-sized grocers<br>Bakery, Candy, Ice Cream, Coffee shops<br>Convenience stores<br>Restaurants/Eating places/Fast food<br>Mass Merchandiser/Wholesale/warehouse/Supercenters/Supermarkets<br>Other food stores/Department Stores<br>Bars and nightclubs serving alcohol/Liquor stores<br>Beauty shops and barbers<br>Banks and Credit unions<br>Pharmacies/Drug Stores<br>Laundromat/Dry cleaning<br>Libraries<br>U.S. Postal Service<br>Light/moderate/vigorous/multi-use physical activity<br>Massage parlors/Spas/Tanning Salons<br>Amusement parks, carnival, rodeo/arcades/gambling<br>Day care/Preschool/Elementary and Secondary schools/Colleges/Universities<br>Museum and art gallery/Zoo, aquarium, arboretum<br>Performance based entertainment/Sports and stadium entertainment<br>Political Organizations/Religious institutions<br>Social clubs/Recreation Clubs/Individual and family social services |
| <b>Sub-domains</b>                | <b>Destinations</b>                                                                                                                                                                                                                                                                                                                                                                                                                                                                                                                                                                                                                                                                                                                                                                                                                                                                                                                              |
| 1.1. Frequent social destinations | Light/moderate/vigorous/multi-use physical activity<br>Beauty shop/Barber<br>Libraries<br>Non-physical activity recreation clubs<br>Religion institutions                                                                                                                                                                                                                                                                                                                                                                                                                                                                                                                                                                                                                                                                                                                                                                                        |
| 1.2. Food stores                  | Mass Merchandiser/Wholesale/warehouse/Supercenters/Supermarkets<br>Small grocers/bodegas/medium-sized grocers<br>Convenience Stores<br>Bakery, Candy, Ice Cream, Coffee shops<br>Other food stores/Discount Department Stores                                                                                                                                                                                                                                                                                                                                                                                                                                                                                                                                                                                                                                                                                                                    |

Supplement Table 2. Descriptive statistics for NETS built environment exposures at different spatial scales.

| Count of walkable destinations           |                       |                       |                       |                       |
|------------------------------------------|-----------------------|-----------------------|-----------------------|-----------------------|
|                                          | <b>Exam 1</b>         | <b>Exam 2</b>         | <b>Exam 3</b>         | <b>Exam 5</b>         |
|                                          | <b>Median (Q1-Q3)</b> | <b>Median (Q1-Q3)</b> | <b>Median (Q1-Q3)</b> | <b>Median (Q1-Q3)</b> |
| <b>1. Walkable destinations</b>          |                       |                       |                       |                       |
| 0 - 0.5 km                               | 9 (2-30)              | 9 (2-31)              | 10 (2-32)             | 11 (3-35)             |
| 0.5 - 1 km                               | 38 (10-104)           | 38 (10-106)           | 39 (10-112)           | 42 (12-118)           |
| 1 - 1.5 km                               | 59 (24-148)           | 61 (24-156)           | 62 (23-161)           | 68 (25-179)           |
| 1.5 - 2 km                               | 76 (34-184)           | 79 (34-197)           | 80 (34-205)           | 95 (38-230)           |
| 2 - 3 km                                 | 229 (121-529)         | 235 (119-540)         | 236 (117-551)         | 280 (119-595)         |
| 3 - 4 km                                 | 346 (179-708)         | 354 (170-740)         | 364 (163-755)         | 407 (177-829)         |
| 4 - 5 km                                 | 369 (196-779)         | 384 (193-809)         | 397 (188-828)         | 447 (207-945)         |
| <b>1.1. Frequent social destinations</b> |                       |                       |                       |                       |
| 0 - 0.5 km                               | 3 (1-10)              | 3 (1-10)              | 3 (1-10)              | 4 (1-11)              |
| 0.5 - 1 km                               | 12 (4-36)             | 13 (4-37)             | 13 (4-38)             | 14 (4-39)             |
| 1 - 1.5 km                               | 19 (8-52)             | 21 (8-54)             | 21 (7-57)             | 23 (8-60)             |
| 1.5 - 2 km                               | 25 (11-66)            | 26 (11-71)            | 27 (11-72)            | 31 (12-75)            |
| 2 - 3 km                                 | 74 (38-180)           | 77 (39-188)           | 80 (36-191)           | 94 (39-200)           |
| 3 - 4 km                                 | 106 (56-210)          | 115 (57-218)          | 118 (53-226)          | 136 (58-265)          |
| 4 - 5 km                                 | 122 (63-225)          | 127 (65-236)          | 129 (63-244)          | 147 (66-295)          |
| <b>1.2. Food stores</b>                  |                       |                       |                       |                       |
| 0 - 0.5 km                               | 1 (0-5)               | 1 (0-5)               | 1 (0-4)               | 1 (0-4)               |
| 0.5 - 1 km                               | 5 (1-16)              | 5 (1-17)              | 5 (1-17)              | 5 (1-16)              |
| 1 - 1.5 km                               | 7 (3-25)              | 8 (3-25)              | 8 (2-26)              | 8 (2-25)              |
| 1.5 - 2 km                               | 9 (3-33)              | 10 (4-33)             | 10 (4-33)             | 10 (3-34)             |
| 2 - 3 km                                 | 29 (12-89)            | 30 (12-90)            | 31 (12-91)            | 30 (12-84)            |
| 3 - 4 km                                 | 40 (18-109)           | 40 (18-110)           | 41 (17-108)           | 42 (19-120)           |
| 4 - 5 km                                 | 46 (21-103)           | 47 (20-106)           | 50 (20-107)           | 53 (20-121)           |

Note: the counts of built environment destinations are in ring-shaped network buffered areas.

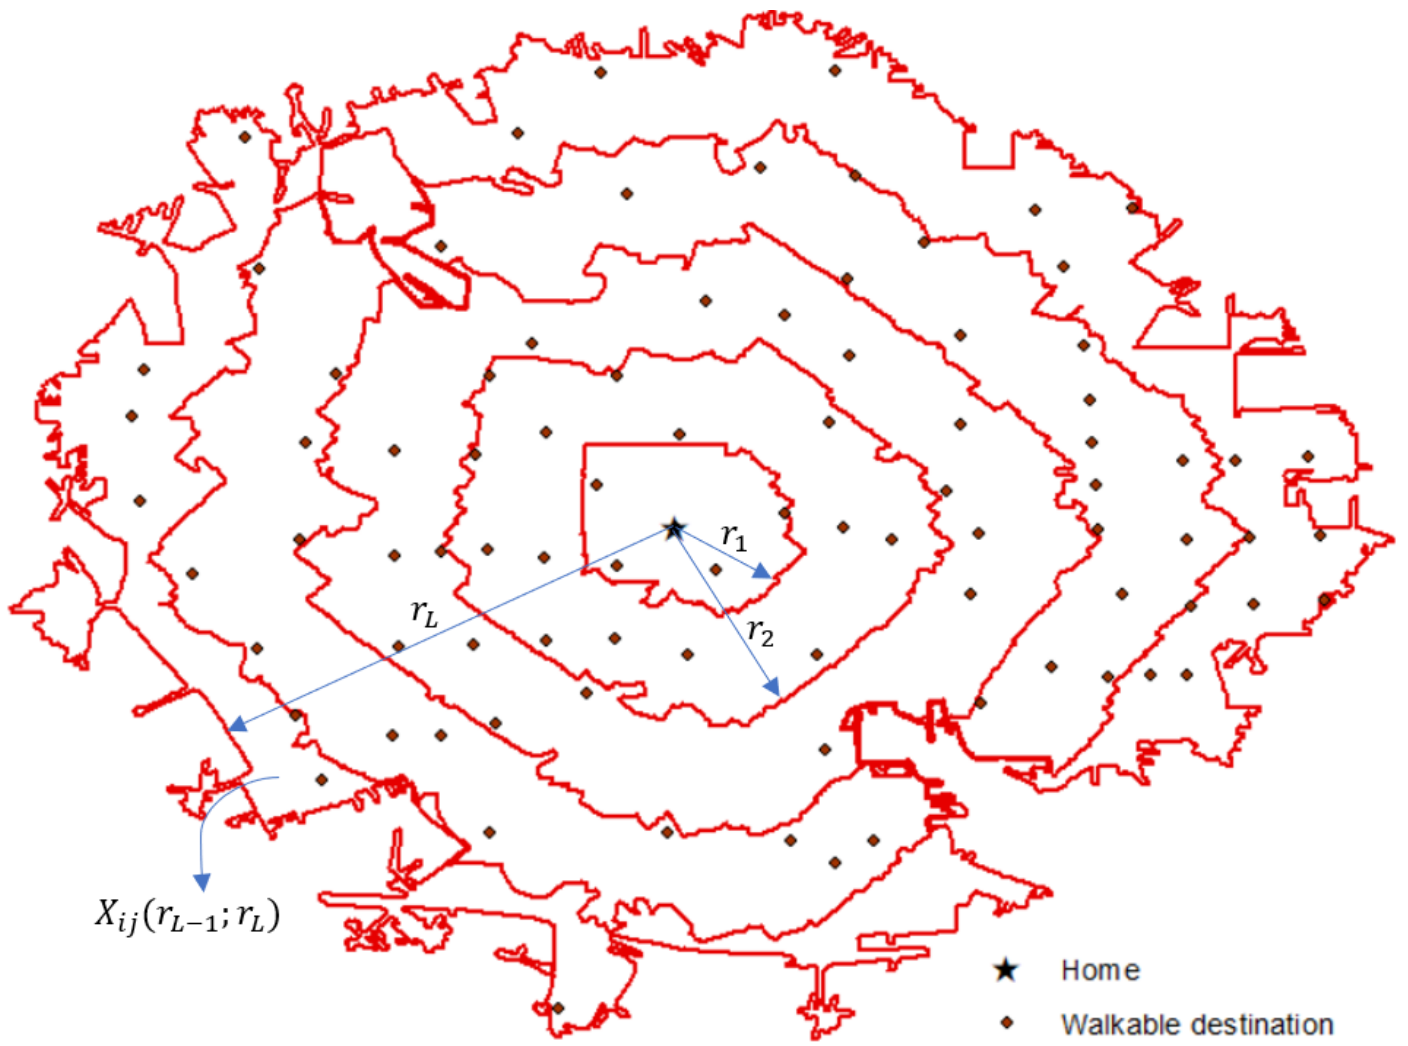

Supplement Figure 1: Ring-shaped network buffers within which built environment destinations were assessed.

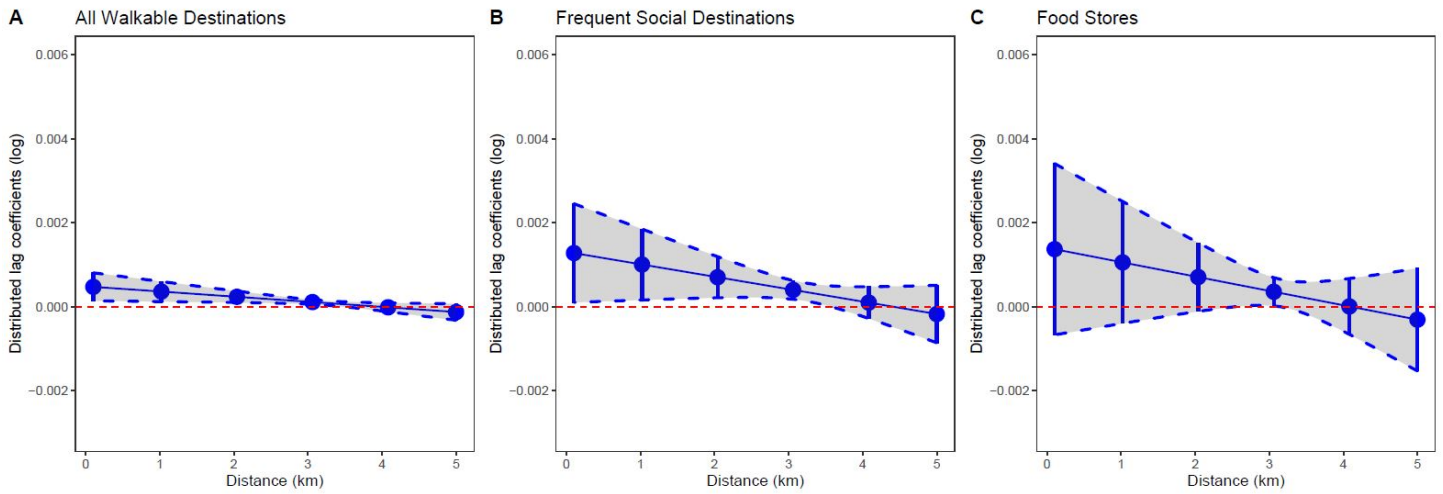

Supplement Figure 2. Distributed lag modeling results for transport walking and BE at Exam 5. Panel A: all walkable destinations; Panel B: frequent social destinations; Panel C: food stores. Dashed gray lines represent 95% confidence intervals. Each model adjusted age, gender, race, education, per capita income and wealth index, BMI, self-rated health, arthritis last 2 weeks, car ownership, marital status, employment status, population density in 1-mile residential buffer, street network ratio at 1-mile residential buffer.
